# Supplementary material for: Essential and Checkpoint Functions of Budding Yeast ATM and ATR during Meiotic Prophase Are Facilitated by Differential Phosphorylation of a Meiotic Adaptor Protein, Hop1
Source: PubMed Central journal article supplement (PMC4520594; doi:10.1371/journal.pone.0134297), 2015-07-30
Supplement: pone.0134297.s004.pdf [file pone.0134297.s004.pdf]

| <b>Strain</b> | <b>Genotype</b>                                                                                                                 |
|---------------|---------------------------------------------------------------------------------------------------------------------------------|
| APY1-2        | <i>hop1Δ::LEU2<sup>r</sup>, ura3::HOP1::URA3<sup>r</sup></i>                                                                    |
| JCY555-556    | <i>hop1Δ::LEU2<sup>r</sup>, ura3::hop1<sup>SCD</sup>::URA3<sup>r</sup></i>                                                      |
| JCY559-560    | <i>hop1Δ::LEU2<sup>r</sup>, ura3::hop1-S298A::URA3<sup>r</sup></i>                                                              |
| APY172-173    | <i>hop1Δ::LEU2<sup>r</sup>, ura3::hop1-S298A::URA3x2<sup>r</sup></i>                                                            |
| APY214-215    | <i>hop1Δ::LEU2<sup>r</sup>, ura3::hop1-S298D::URA3<sup>r</sup></i>                                                              |
| JCY604/610    | <i>hop1Δ::LEU2<sup>r</sup>, ura3::hop1-S311A::URA3<sup>r</sup></i>                                                              |
| JCY553-554    | <i>hop1Δ::LEU2<sup>r</sup>, ura3::hop1-T318A::URA3<sup>r</sup></i>                                                              |
| JCY593-594    | <i>hop1Δ::LEU2<sup>r</sup>, ura3::HOP1::URA3<sup>r</sup>, dmc1Δ::KanMX4<sup>r</sup></i>                                         |
| JCY587-588    | <i>hop1Δ::LEU2<sup>r</sup>, ura3::hop1<sup>SCD</sup>::URA3<sup>r</sup>, dmc1Δ::KanMX4<sup>r</sup></i>                           |
| JCY591-592    | <i>hop1Δ::LEU2<sup>r</sup>, ura3::hop1-S298A::URA3<sup>r</sup>, dmc1Δ::KanMX4<sup>r</sup></i>                                   |
| APY209-210    | <i>hop1Δ::LEU2<sup>r</sup>, ura3::hop1-S298A::URA3x2<sup>r</sup>, dmc1Δ::KanMX4<sup>r</sup></i>                                 |
| APY199-200    | <i>hop1Δ::LEU2<sup>r</sup>, ura3::hop1-S298D::URA3<sup>r</sup>, dmc1Δ::KanMX4<sup>r</sup></i>                                   |
| APY15-16      | <i>hop1Δ::LEU2<sup>r</sup>, ura3::hop1-S311A::URA3<sup>r</sup>, dmc1Δ::KanMX4<sup>r</sup></i>                                   |
| JCY585        | <i>hop1Δ::LEU2<sup>r</sup>, ura3::hop1-T318A::URA3<sup>r</sup>, dmc1Δ::KanMX4<sup>r</sup></i>                                   |
| HTY2091       | <i>hed1Δ::hphMX4<sup>r</sup></i>                                                                                                |
| APY68/70      | <i>hop1Δ::LEU2<sup>r</sup>, ura3::hop1-S298A::URA3<sup>r</sup>, hed1Δ::hphMX4<sup>r</sup></i>                                   |
| HTY2092       | <i>dmc1Δ::KanMX4<sup>r</sup>, hed1Δ::hphMX4<sup>r</sup></i>                                                                     |
| APY67         | <i>hop1Δ::LEU2<sup>r</sup>, ura3::hop1-S298A::URA3<sup>r</sup>, dmc1Δ::KanMX4<sup>r</sup>, hed1Δ::hphMX4<sup>r</sup></i>        |
| JCY623        | <i>hop1Δ::LEU2<sup>r</sup>, ura3::HOP1::URA3<sup>r</sup>, rad50S::URA3<sup>r</sup></i>                                          |
| APY50         | <i>hop1Δ::LEU2<sup>r</sup>, ura3::hop1-S298A::URA3<sup>r</sup>, rad50S::URA3<sup>r</sup></i>                                    |
| APY83         | <i>hop1Δ::LEU2<sup>r</sup>, ura3::HOP1::URA3<sup>r</sup>, MEK1-3HA::URA3<sup>r</sup></i>                                        |
| APY85         | <i>hop1Δ::LEU2<sup>r</sup>, ura3::hop1-S298A::URA3<sup>r</sup>, MEK1-3HA::URA3<sup>r</sup></i>                                  |
| APY405        | <i>hop1Δ::LEU2<sup>r</sup>, ura3::hop1-S298A::URA3x2<sup>r</sup>, MEK1-3HA::URA3<sup>r</sup></i>                                |
| APY404        | <i>hop1Δ::LEU2<sup>r</sup>, ura3::hop1-S298D::URA3<sup>r</sup>, MEK1-3HA::URA3<sup>r</sup></i>                                  |
| APY370-371    | <i>hop1Δ::LEU2<sup>r</sup>, ura3::hop1-T318A::URA3<sup>r</sup>, MEK1-3HA::URA3<sup>r</sup></i>                                  |
| APY134        | <i>hop1Δ::LEU2<sup>r</sup>, ura3::HOP1::URA3<sup>r</sup>, MEK1-3HA::URA3<sup>r</sup>, dmc1Δ::KanMX4<sup>r</sup></i>             |
| APY32-33      | <i>hop1Δ::LEU2<sup>r</sup>, ura3::hop1-S298A::URA3<sup>r</sup>, MEK1-3HA::URA3<sup>r</sup>, dmc1Δ::KanMX4<sup>r</sup></i>       |
| APY422        | <i>hop1Δ::LEU2<sup>r</sup>, ura3::hop1-S298A::URA3x2<sup>r</sup>, MEK1-3HA::URA3<sup>r</sup>,<br/>dmc1Δ::KanMX4<sup>r</sup></i> |
| APY420        | <i>hop1Δ::LEU2<sup>r</sup>, ura3::hop1-S298D::URA3<sup>r</sup>, MEK1-3HA::URA3<sup>r</sup>, dmc1Δ::KanMX4<sup>r</sup></i>       |
| JCY573        | <i>hop1Δ::LEU2<sup>r</sup>, ura3::hop1-T318A::URA3<sup>r</sup>, MEK1-3HA::URA3<sup>r</sup>, dmc1Δ::KanMX4<sup>r</sup></i>       |
